# Supplementary material for: Neurons with Cat’s Eyes: A Synthetic Strain of α-Synuclein Fibrils Seeding Neuronal Intranuclear Inclusions
Source: MDPI journal article supplement (doi:10.3390/biom12030436), 2022-03-11
Supplement: s1 [file s1]

## Legends to videos files for biomolecules-1610392

- Legend to Video Abstract :
- **23-day-old  $\alpha$ -Syn Neuronal Intranuclear Inclusion (NII) seeded by the synthetic  $\alpha$ -Syn amyloid strain 1B in a cultured mouse cortical neuron.**  
Animation of a 3D volume rendering of a nuclear Lamin (white)/phospho-S129  $\alpha$ -Syn (red) Z-stack. A “2-beam” NII forming a cross spans the whole nuclear volume. In this movie the Lamin channel is periodically switched on & off to let the observer appreciate the 3D organization of the NII embedded in the nucleus. Max diameter of the nucleus (Lamin, white) is 11  $\mu$ M.
- 
- Legend to Supplementary video S1 :
- **Crosswise  $\alpha$ -Syn NII that diametrically bridges two regions of a NCI partially enveloping the nucleus of a mouse nigral neuron 4 months after *in vivo* injection of 1B fibrils.** The movie shows a full 360° animated series of the 3D volume of a nigral neuron soma marked for phospho-S129  $\alpha$ -Syn (red) and DNA using DRAQ7 (white). The neuronal soma was chopped *in silico* to reveal a section plane going through the crosswise portion of the NII. The series is shown for the overlay volume (white and red), for the  $\alpha$ -Syn inclusions volume only (red), and for the DNA volume only (white). It is clearly visible that the NII bridge pushes apart the chromatin, creating a DNA-free tunnel (low DRAQ7 signal, white) along its diametral course (nuclear diameter at the level of the *in silico* section: 9  $\mu$ m) . Note the presence of a healthy bystander neuron without inclusion.
- 
- Legend to Supplementary video S2:
- **3D volume reconstruction a mouse nigral neuron harboring both a NCI and a single beam NII without any apparent connections, 4 months after *in vivo* injection of 1B fibrils.** DNA is marked with DRAQ7 (white) and phospho-S129  $\alpha$ -Syn is in red. The 3D volume was animated (360° rotation), and the nuclear DNA signal was cyclically switched on & off to let the observer appreciate the NII and NCI 3D morphologies. Nucleus max. diameter (DRAQ7, white): 13  $\mu$ M.
